# Supplementary material for: Defect-rich molybdenum dioxide cluster coupled hierarchical carbon toward advanced Na–S batteries
Source: Royal Society of Chemistry journal article supplement (doi:10.1039/d5cc06763d), 2025-12-27
Supplement: d5cc06763d1.pdf [file d5cc06763d1.pdf]

## **Supplementary information**

### **Defect-rich molybdenum dioxide cluster coupled hierarchical carbon toward advanced Na-S batteries**

Haonan Wanga<sup>+</sup>, Guangming Caoa<sup>+</sup>, Junquan Chenga, Bin Chena, Xin Xiaa, Youcun Baia\*, Zhichao Yea, Baoxue Wanga, Feng Liua\*, Heng Zhanga\*

<sup>a</sup>Institute for Materials Science and Devices, School of Materials Science and Engineering, Suzhou University of Science and Technology, Suzhou 215009, P.R. China

<sup>+</sup> Equal contributors

\*Corresponding author: Youcun Bai, Feng Liu, Heng Zhang

E-mail address: ycbai@usts.edu.cn (Youcun Bai); feng.liu@usts.edu.cn (Feng Liu);

zhangheng@usts.edu.cn (Heng Zhang)

## Experimental:

All the chemical substances involved in this article are analytical grade components and have not undergone any purification. Ammonium molybdate ( $(\text{NH}_4)_6\text{Mo}_7\text{O}_{24}\cdot 4\text{H}_2\text{O}$ ) and dopamine hydrochloride were purchased from Aladdin (China). The other reagents were purchased from Tansoole (China).

### Synthesis of $\text{MoO}_3$ nanorods

One-dimensional  $\text{MoO}_3$  nanorods were synthesized via a hydrothermal method. Typically,  $(\text{NH}_4)_6\text{Mo}_7\text{O}_{24}\cdot 4\text{H}_2\text{O}$  (710 mg) was dissolved in 20 mL of an aqueous  $\text{HNO}_3$  solution ( $\text{HNO}_3$ :  $\text{H}_2\text{O}$  volume ratio = 1: 5). The resulting solution was transferred into a Teflon-lined autoclave and underwent hydrothermal treatment at 180 °C for 24 h. After cooling to room temperature, the white precipitate was collected by centrifugation and washed thoroughly with deionized water twice.

### Synthesis of defect-rich $\text{MoO}_{2-x}$ cluster anchored nitrogen-doped carbon nanotubes ( $\text{MoO}_{2-x}/\text{NC}$ )

The Mo-dopamine hybrid precursor nanotubes were prepared by a template-mediated co-precipitation method. In a typical procedure, a mixture of  $\text{MoO}_3$  nanorods (300 mg),  $(\text{NH}_4)_6\text{Mo}_7\text{O}_{24}\cdot 4\text{H}_2\text{O}$  (300 mg), and dopamine hydrochloride (300 mg) in 8 mL  $\text{H}_2\text{O}$  was blended with 40 mL ethanol. Upon rapid injection of 50  $\mu\text{L}$   $\text{NH}_3\cdot\text{H}_2\text{O}$ , a dark red suspension formed readily. The product, collected by centrifugation after 6 h of stirring, was then calcined under  $\text{H}_2/\text{Ar}$  at 600 °C for 8 h (5 °C  $\text{min}^{-1}$ ) to yield the final  $\text{MoO}_{2-x}/\text{NC}$  composite.

### Synthesis of N doped carbon (NC)

The as-obtained  $\text{MoO}_{2-x}/\text{NC}$  composite was subjected to etching by stirring in a mixed solution of concentrated hydrochloric acid ( $\text{HCl}$ ) and nitric acid ( $\text{HNO}_3$ ) at 80 °C to remove the  $\text{MoO}_2$  clusters. Upon completion of the treatment, the black product was collected, isolated by successive suction filtration and centrifugation, and then dried under vacuum at 60 °C for 12 h to obtain the final NC powder.

## **Material characterization**

The crystallographic structure was determined by Rigaku D/max-ga X-ray diffraction (XRD) equipped with Cu K $\alpha$  radiation ( $\lambda = \sim 1.54178 \text{ \AA}$ ). The morphology and structure of samples were characterized using a JEOL JSM-IT800 scanning electron microscope (SEM) and a JEM-2100 transmission electron microscope (TEM) with an EDS probe. Thermogravimetric analysis (TGA) was performed on a TAQ 50 thermogravimetric analyzer under an Ar atmosphere up to 600 °C. Thermo Scientific K-alpha X-ray photoelectron spectrometer (XPS) measurements were used to analyze the surface chemical states, which were examined with a monochromatic Al K $\alpha$  (1486.8 eV) radiation.

## **Electrochemical measurements**

The 2032-type coin cells were assembled in an argon-filled glovebox ( $\text{H}_2\text{O}$ ,  $\text{O}_2 < 0.01$  ppm). The cathode slurry was prepared by thoroughly mixing the active material, acetylene black, and carboxymethyl cellulose (CMC) in a weight ratio of 7:2:1 in an agate mortar for 30 min. The homogeneous slurry was then coated onto substrates and vacuum-dried at 60 °C for 12 h. The mass loading of electrodes was controlled to be 1.0-2.0 mg cm $^{-2}$ . Sodium metal foil was used as the anode, and 1 M NaPF $_6$  in a mixed solvent of DIGLYME and DOL (1:1 by volume) served as the electrolyte. The specific procedure involves adding 100  $\mu\text{L}$  of electrolyte solution in equal volumes to both sides of the glass fiber separator (GF-D), then assembling the cell with a commercial sodium plate serving as the anode. The cells were initially activated at a low current rate before proceeding to long-term cycling tests. Galvanostatic charge-discharge measurements were carried out using a Neware battery testing system (Shenzhen, China) within a voltage window of 0.5-2.9 V (vs. Na $^+$ /Na). Cyclic voltammetry (CV) and electrochemical impedance spectroscopy (EIS) were performed on a CHI660E electrochemical workstation (Shanghai, China).

## **Calculate the diffusion rate of sodium ion based on CV**

By testing the CV curves of different scan rates (0.2, 0.5, 0.8, 1.0, 1.5 mV s $^{-1}$ ) within a voltage window of 0.5 V – 2.9 V, the measured peak current can be plotted against the

square root of the scan rate to fit the slope ( $k$ ) of different samples, which can macroscopically describe the diffusion rate of sodium ion. The calculation process is as follows:

$$i_p = k \times v^{1/2} \quad (1)$$

According to the Randles Sivick equation:

$$k = 2.69 \times 10^5 n^{3/2} A D^{1/2} v^{1/2} C \quad (2)$$

Here,  $i_p$  represents the peak current,  $n$  represents the number of electron transfers in the reaction (for  $\text{Na}^+$ ,  $n = 1$ ), the  $A$  represents the effective area of the electrode ( $1.13 \text{ cm}^2$ ),  $C$  is the  $\text{Na}^+$  concentration in the battery,  $v$  represents the scanning rate, and  $D$  is the diffusion coefficient of  $\text{Na}^+$ .

### **Calculated the diffusion rate of sodium ion based on Galvanostatic intermittent titration technique (GITT)**

GITT measurements were taken by charge/discharge at 0.1 C for 30 minutes, followed by 3 h relaxation period until the specified cut-off voltage was reached. The  $\text{Na}^+$  diffusion coefficient can be calculated using the following equation:

$$D(\text{Na}^+) = 4/(\pi\tau) \times (n_m V_m / A)^2 \times (\Delta E_s / \Delta E_t)^2 \quad (3)$$

Herein,  $\tau$ ,  $n_m$ ,  $V_m$  and  $A$  denote the relaxation time, the molar quantity, the molar volume of the electrode material and the surface area of electrode material. In addition,  $\Delta E_s$  and  $\Delta E_t$  denote the voltage changes induced by the pulse during constant-current charge/discharge.

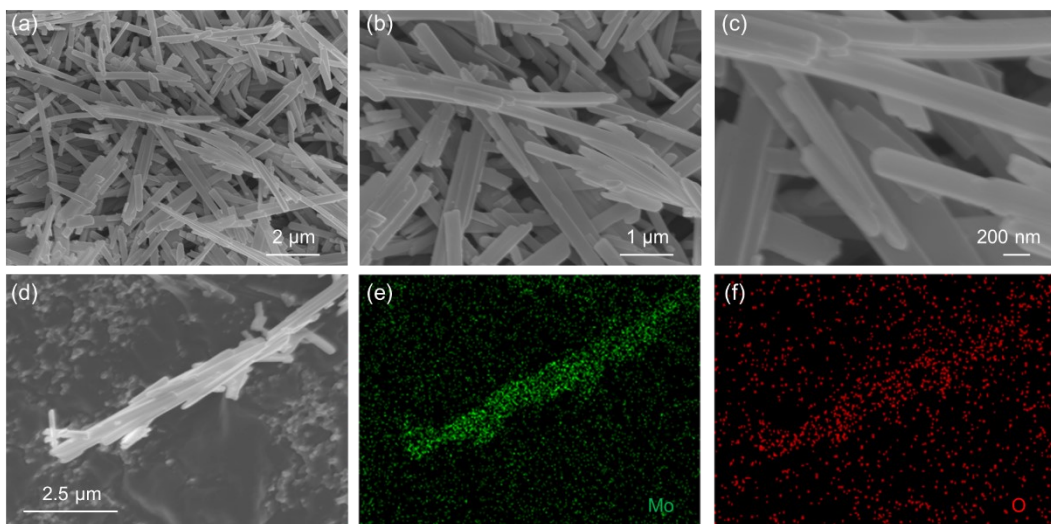

**Fig. S1.** (a-c) SEM images of the MoO<sub>3</sub> nanorods at different magnifications. (d-f) EDS-mapping image and corresponding elemental mappings of the MoO<sub>3</sub> nanorods.

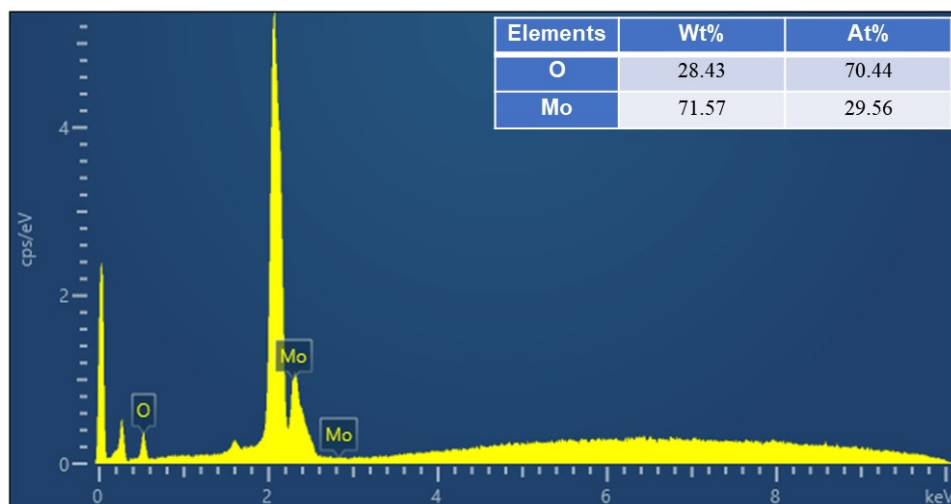

**Fig. S2.** EDX spectrum of the MoO<sub>3</sub>.

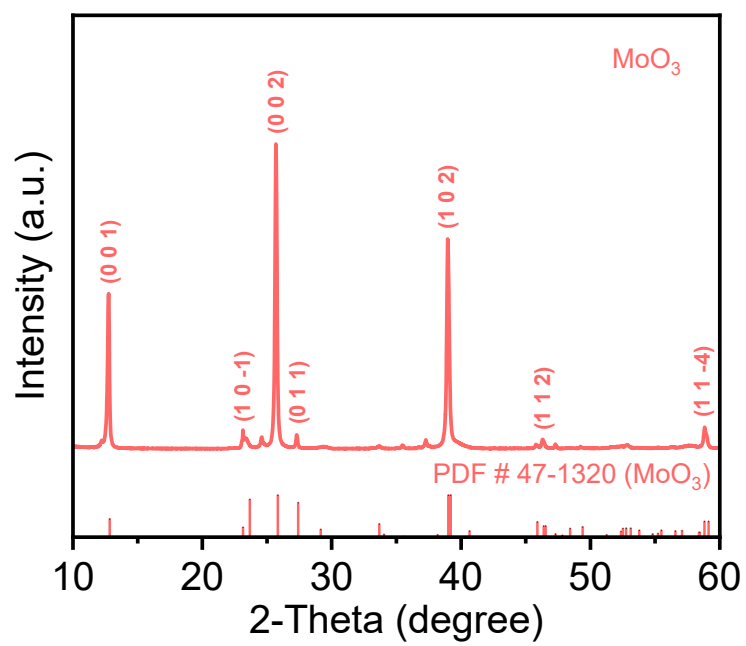

**Fig. S3.** XRD pattern of the MoO<sub>3</sub> nanorods.

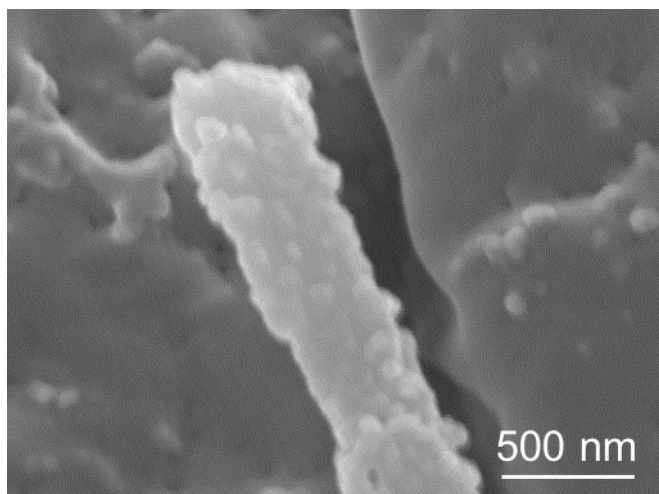

**Fig. S4.** SEM images of the Mo-dopamine hybrid precursor nanotubes.

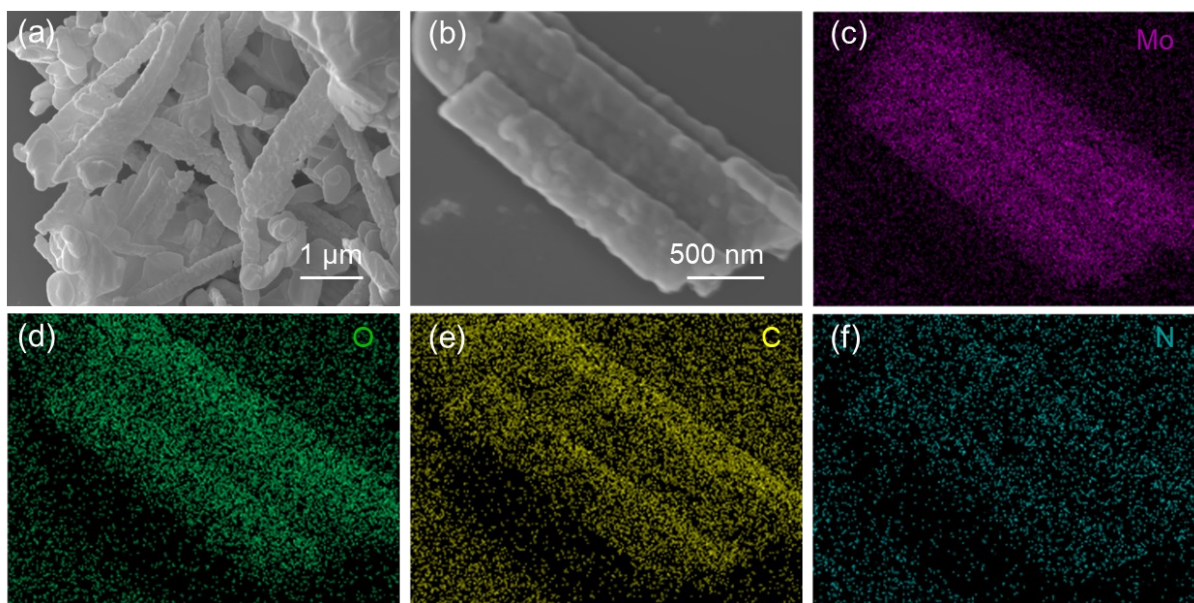

**Fig. S5.** (a, b) SEM images of the MoO<sub>2-x</sub>/NC under low magnification and (c-f) EDS mapping at low magnification.

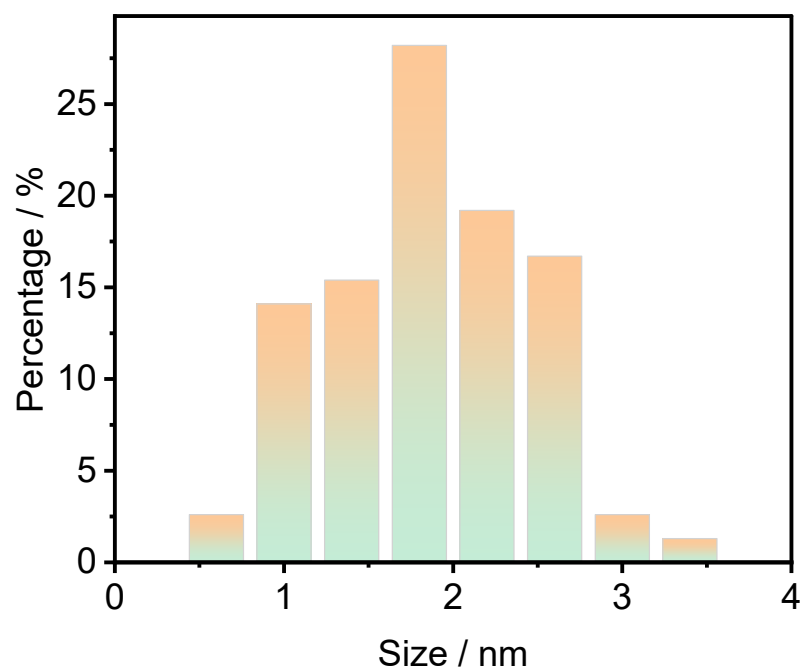

**Fig. S6.** The size distribution of the MoO<sub>2-x</sub> clusters on MoO<sub>2-x</sub>/NC composite materials.

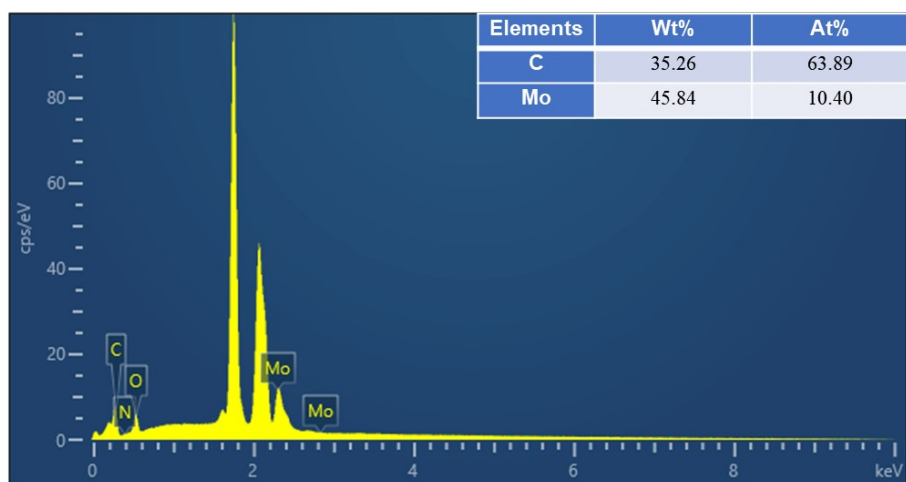

**Fig. S7.** EDX spectrum of the MoO<sub>2-x</sub>/NC composite

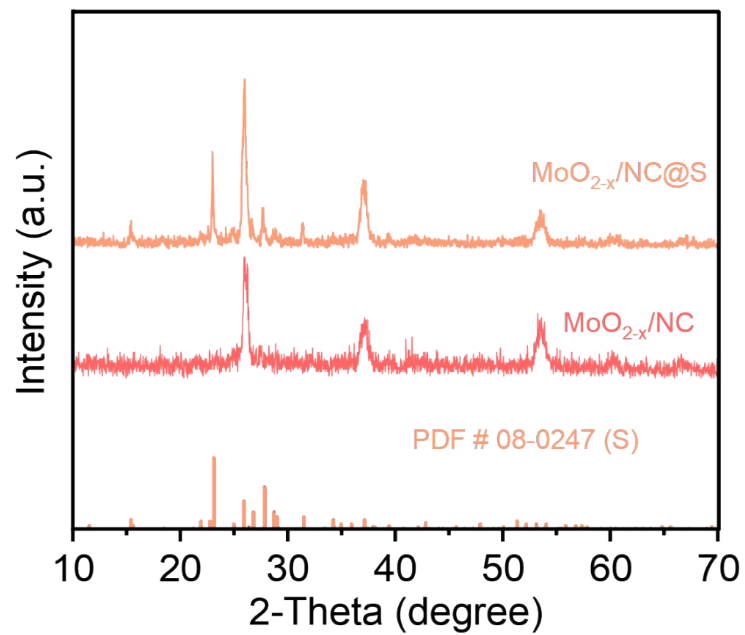

**Fig. S8.** XRD patterns of  $\text{MoO}_{2-x}/\text{NC}$  and  $\text{MoO}_{2-x}/\text{NC@S}$ .

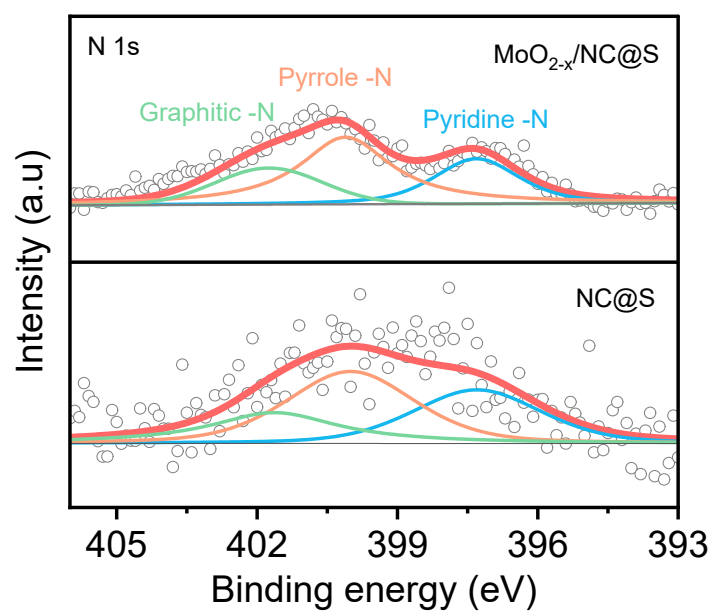

**Fig. S9.** High-resolution XPS N 1s spectra of the  $\text{MoO}_{2-x}/\text{NC}@S$ .

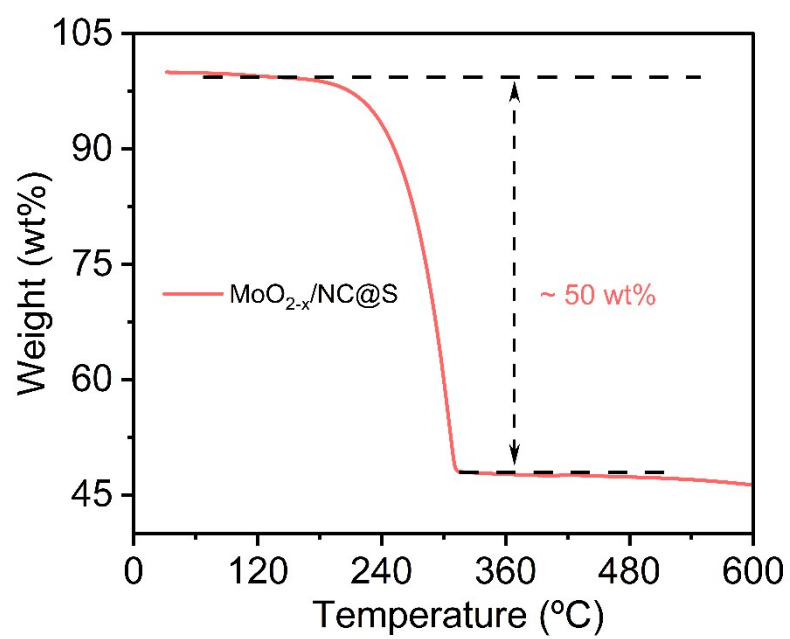

**Fig. S10.** Thermogravimetric analysis curve of  $\text{MoO}_{2-x}/\text{NC}@S$ .

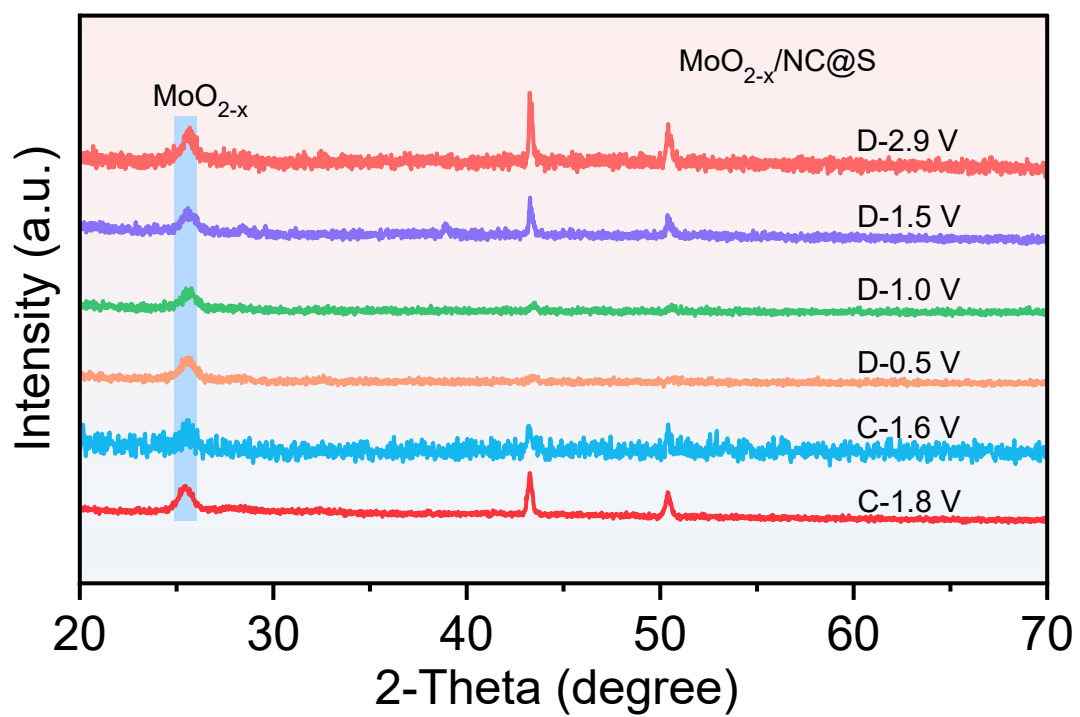

**Fig. S11.** *Ex-situ* XRD curves of the  $\text{MoO}_{2-x}/\text{NC@S}$ .

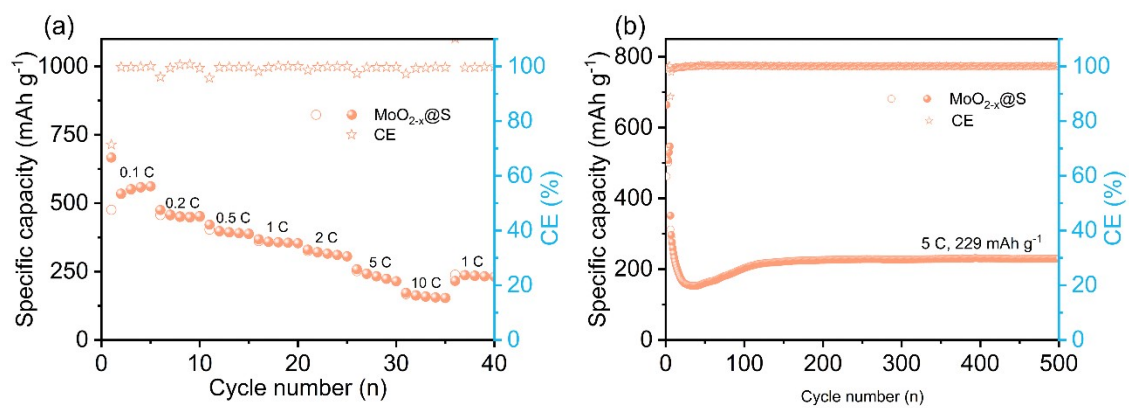

**Fig. S12.** (a) Rate performance and (b) long-term cycling performance of  $\text{MoO}_{2-x}\text{@S}$ .

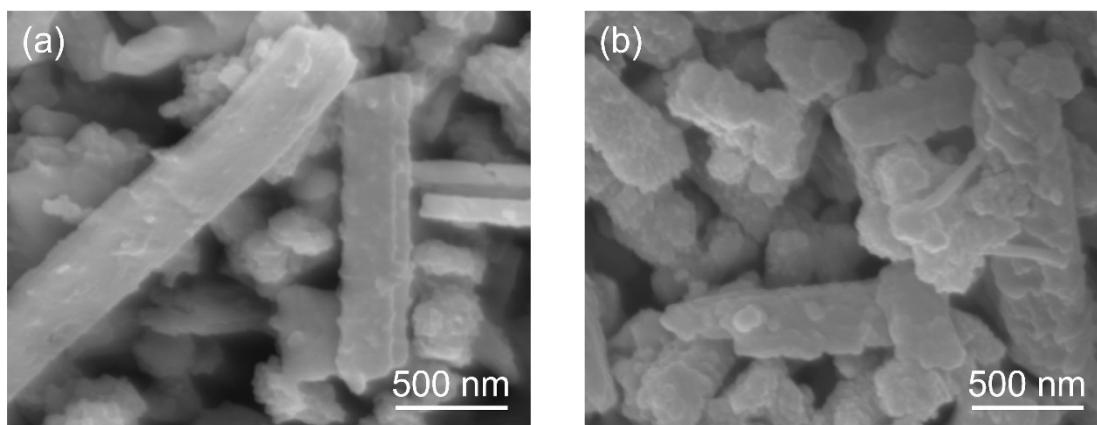

**Fig. S13.** SEM images of  $\text{MoO}_{2-x}/\text{NC}@S$  (a) initial and (b) after cycling.

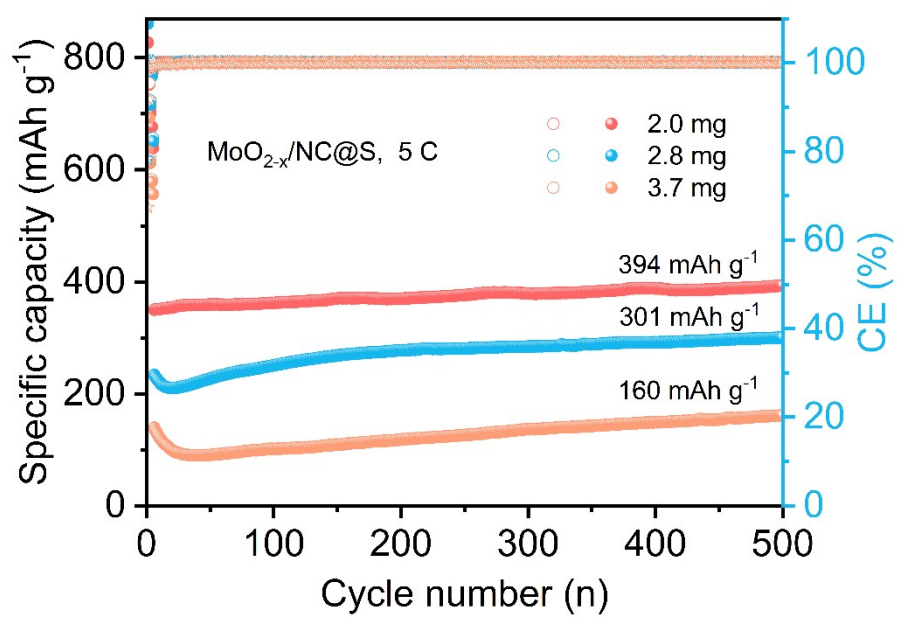

**Fig. S14** The performance of MoO<sub>2-x</sub>/NC@S at different active material loadings.

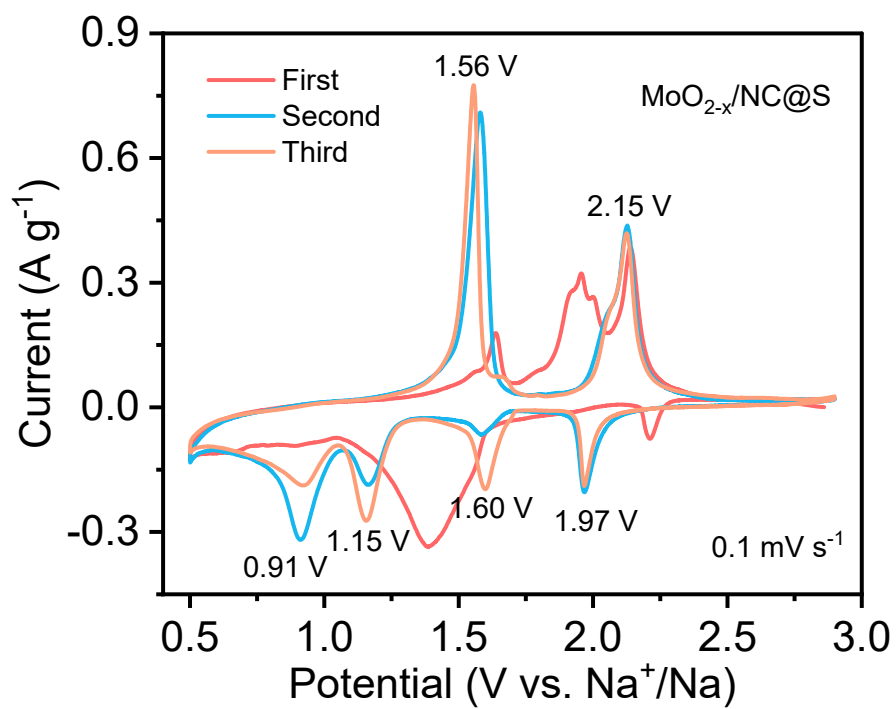

**Fig. S15.** First three CV curves of  $\text{MoO}_{2-x}/\text{NC@S}$  at a scan rate of  $0.1 \text{ mV s}^{-1}$ .

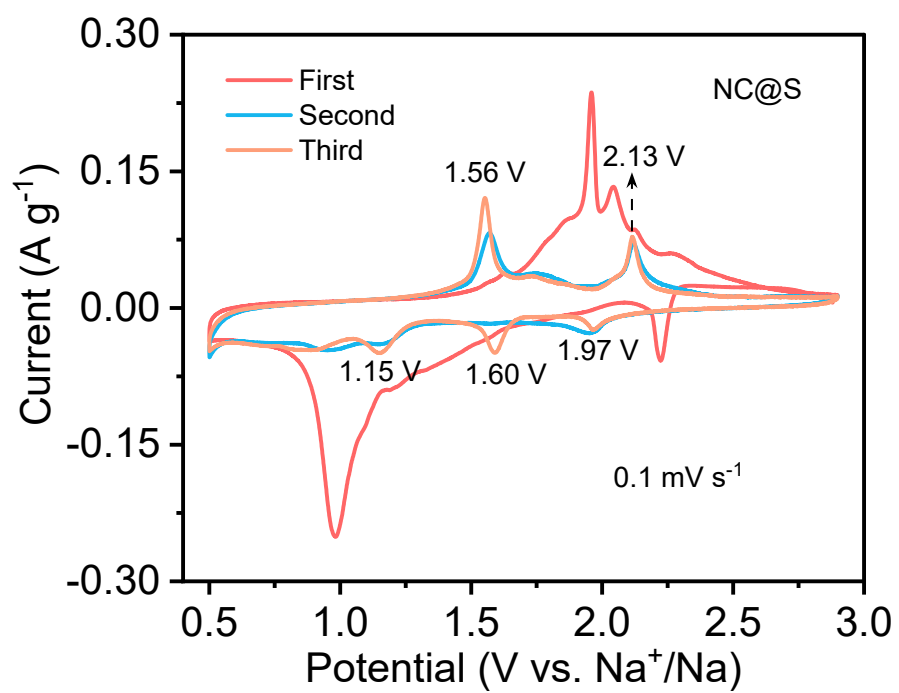

**Fig. S16.** First three CV curves of NC@S at a scan rate of 0.1 mV s<sup>-1</sup>.

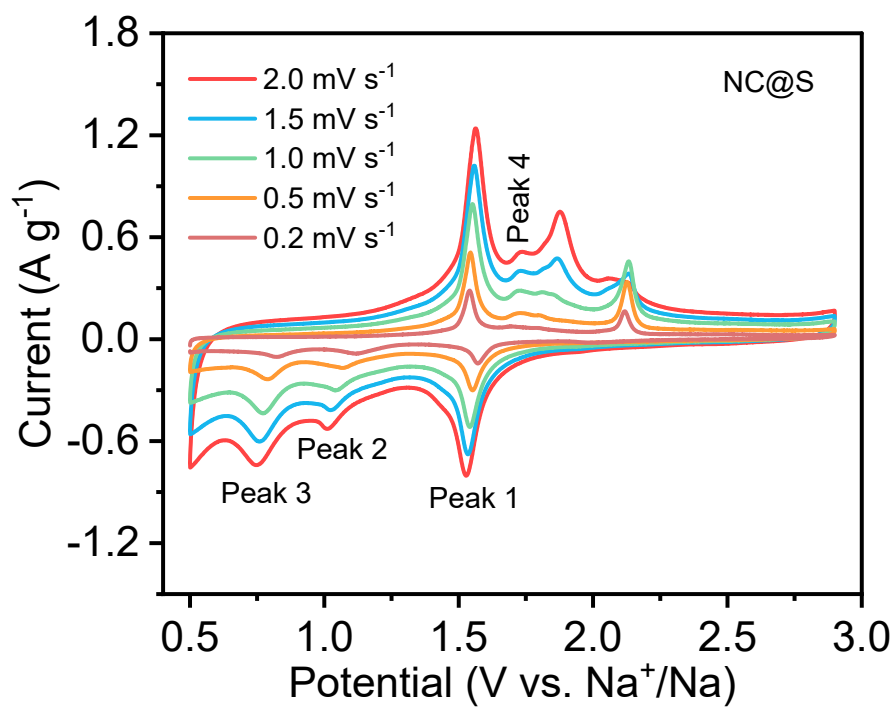

**Fig. S17.** CV curves of NC@S at various scan rate.

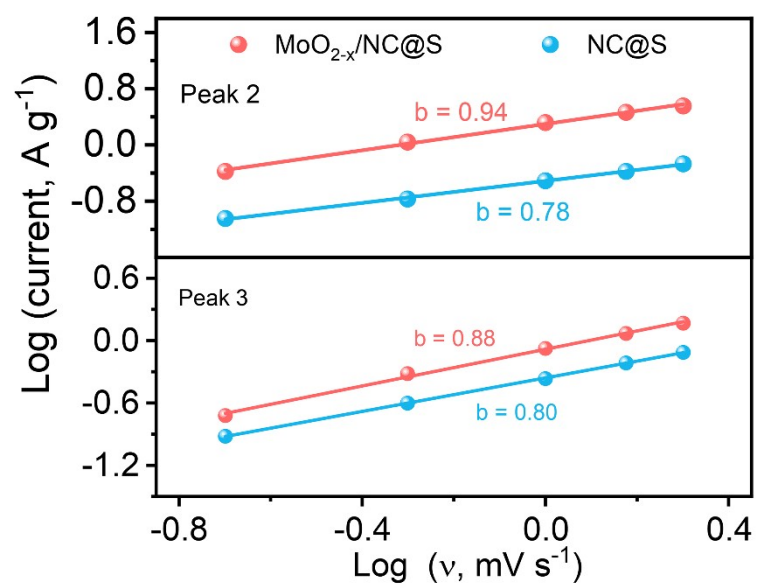

**Fig. S18.** Slope of the double logarithmic curve based on the scan rate and current density at peak 2.

**Table S1.** Comparison of the performance of as-prepared MoO<sub>2-x</sub>/NC@S and other materials in recently reported works

| Electrode materials        | Initial Capacity/<br>Current density                  | Capacity/Cycle number/Current density                        | Capacity retention rate (%) | References                                           |
|----------------------------|-------------------------------------------------------|--------------------------------------------------------------|-----------------------------|------------------------------------------------------|
| MoO <sub>2-x</sub> /NC@S   | 1069 mAh g <sup>-1</sup> /<br>0.119 A g <sup>-1</sup> | 331 mAh g <sup>-1</sup> /2000 cycles/8.375 A g <sup>-1</sup> | 94                          | <b>This work</b>                                     |
| TiO <sub>2</sub> @SPC-S    | 664 mAh g <sup>-1</sup> /<br>0.119 A g <sup>-1</sup>  | 283 mAh g <sup>-1</sup> /400 cycles/2 A g <sup>-1</sup>      | 64                          | <i>J. Colloid. Interface Sci.</i> 2025, 684, 235-242 |
| Ni-MoS <sub>2</sub> @MPC/S | 1432 mAh g <sup>-1</sup> /<br>0.1 A g <sup>-1</sup>   | 467 mAh g <sup>-1</sup> /500 cycles/3A g <sup>-1</sup>       | 44                          | <i>Chem. Eng. J.</i> 2025, 514, 163123               |
| S@Mn <sub>1</sub> -PNC     | 989 mAh g <sup>-1</sup> /<br>0.1 A g <sup>-1</sup>    | 360 mAh g <sup>-1</sup> /2000 cycles/2 A g <sup>-1</sup>     | 76                          | <i>Nat. Commun.</i> 2024, 15, 3325                   |
| S@HPC/Mo <sub>2</sub> C    | 1408 mAh g <sup>-1</sup> /<br>0.2 A g <sup>-1</sup>   | 503 mAh g <sup>-1</sup> /800 cycles/5 A g <sup>-1</sup>      | 35                          | <i>Adv. Mater.</i> 2022, 34, 2200479                 |
| FeS <sub>2</sub> @NCMS/S   | 1471 mAh g <sup>-1</sup> /<br>0.1 A g <sup>-1</sup>   | 395 mAh g <sup>-1</sup> /850 cycles/1 A g <sup>-1</sup>      | 27                          | <i>Adv. Mater.</i> 2020, 32, 1906700                 |
| NiS <sub>2</sub> @NPCTs/S  | 760 mAh g <sup>-1</sup> /<br>0.1 A g <sup>-1</sup>    | 401 mAh g <sup>-1</sup> /750 cycles/1 A g <sup>-1</sup>      | 42                          | <i>Nat. Commun.</i> 2019, 10, 4793                   |
| S@Fe-HC                    | 1023 mAh g <sup>-1</sup> /<br>0.1 A g <sup>-1</sup>   | 394 mAh g <sup>-1</sup> /1000 cycles/0.1 A g <sup>-1</sup>   | 39                          | <i>Angew. Chem.</i> 2019, 131,1498                   |
| S@Co <sub>n</sub> -HC      | 1081 mAh g <sup>-1</sup> /<br>0.1 A g <sup>-1</sup>   | 508 mAh g <sup>-1</sup> /600 cycles/0.4 A g <sup>-1</sup>    | 47                          | <i>Nat. Commun.</i> 2018, 9, 4082                    |
| CN/Au/S                    | 830 mAh g <sup>-1</sup> /<br>0.1 A g <sup>-1</sup>    | 430 mAh g <sup>-1</sup> /1000 cycles/2 A g <sup>-1</sup>     | 42                          | <i>Energy Environ. Sci.</i> , 2020, 13, 562          |
| Core-shell ZCS@S           | 768 mAh g <sup>-1</sup> /<br>0.5 A g <sup>-1</sup>    | 250 mAh g <sup>-1</sup> /2000 cycles/1 A g <sup>-1</sup>     | 26                          | <i>ACS Nano</i> 2020, 14, 6, 7259                    |

## Reference

- [1] C. Guan, X. Liu, W. Ren, X. Li, C. Cheng, J. Wang, *Adv. Energy Mater.*, 7 (2017) 1602391.
- [2] L. Fan, R. Ma, Q. Zhang, X. Jia, B. Lu, *Angew. Chem.* 2019, 131,10610-10615.
- [3] Q. Liu, Z. Hu, Y. Liang, L. Li, C. Zou, H. Jin, S. Wang, H. Lu, Q. Gu, S. Chou, Y. Liu, S. Dou, *Angew. Chem.* 2020, 132,5197-5202.
- [4] W. Li, S. Chou, J. Wang, H. Liu, S. Dou, *Nano Lett.* 2013, 13, 5480-5484.
- [5] Y. Huang, Z. Wang, Y. Jiang, S. Li, Z. Li, H. Zhang, F. Wu, M. Xie, L. Li, R. Chen, *Nano Energy* 2018, 53 524-535.
- [6] S. Chen, F. Wu, L. Shen, Y. Huang, S. Sinha, V. Srot, P. Aken, J. Maier, Y. Yu, *ACS Nano* 2018, 12, 7018-7027.
- [7] W. Zhao, X. Ma, G. Wang, X. Long, Y. Li, W. Zhang, P. Zhang, *Appl. Surf. Sci.* 2018, 445, 167-174.
